# Supplementary material
Source: Springer Nature journal article supplement (https://www.springermedizin.de/resource/supplementary/12936_2012_2491_MOESM5_ESM.pdf/9542830)

**Additional File 5. MALDI mass spectrum (Bruker Daltonics Flex analysis) of RPHPLC purified linear dimeric peptide.**

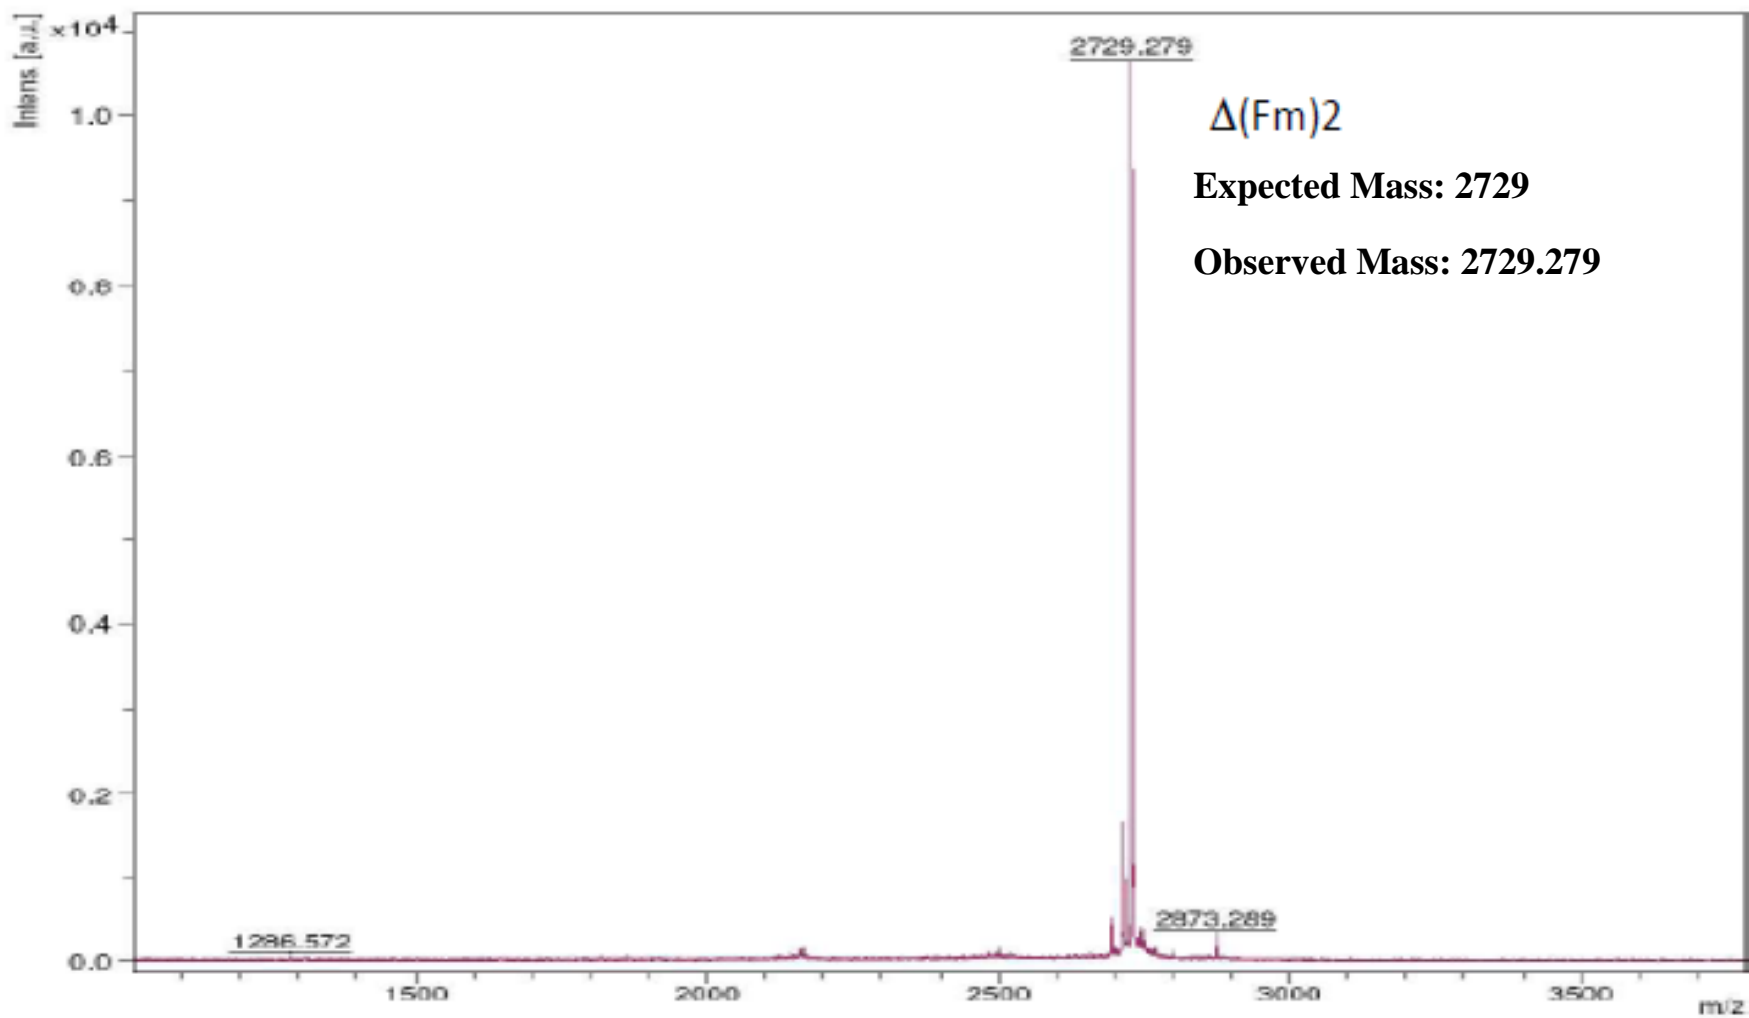

Supplement: MOESM5 [file 9542830]
